# Supplementary material
Source: Springer Nature journal article supplement (https://www.springerprofessional.de/resource/supplementary/13673_2012_41_MOESM6_ESM.pdf/11899370)

## Performance during Initial Registration

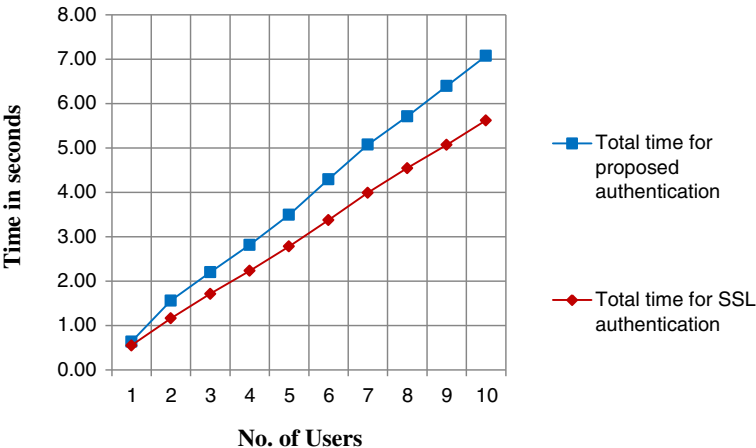

Supplement: MOESM6 [file 11899370]
